# Supplementary material
Source: PubMed Central journal article supplement (PMC3319192)
Supplement: NIHMS362103-supplement-1_si_001.pdf [file NIHMS362103-supplement-1_si_001.pdf]

## Supporting information

**Table 1.** Primers used for site-directed mutagenesis of OATP1B1 and OATP1B3.

| <b>OATP1B1</b> |                                                                       |
|----------------|-----------------------------------------------------------------------|
| OATP1B1_L36F   | 5'-GGCAGCTCTGTCA <u>T</u> TCAGCTTTATTGCTAAGAC-3'                      |
| OATP1B1_F38Y   | 5'-GCTCTGTCACTCAGCT <u>A</u> TATTGCTAAGACACTAGG-3'                    |
| OATP1B1_T42A   | 5'-CACTCAGCTTTATTGCTAAG <u>G</u> CACTAGGTGC-3'                        |
| OATP1B1_A45G   | 5'-GCTAAGACACTAGGTG <u>G</u> AATTATTATGAAAAGTTCCATC-3'                |
| OATP1B1_S50I   | 5'-GGTGAATTATTATGAAAA <u>T</u> TTCCATCATTTCATATAGAACGG-3'             |
| OATP1B1_I53T   | 5'-GGTGAATTATTATGAAAAGTTCCATCA <u>C</u> TCATATAGAACGGAG-3'            |
| OATP1B1_H54Q   | 5'-GAAAAGTTCCATCATTCA <u>A</u> ATAGAACGGAGATTTGAG -3'                 |
| OATP1B1_Y535F  | 5'-GATGCTTGTACAAGGAAATTTT <u>I</u> CTTTTTTGTGCAATACAAGTC-3'           |
| OATP1B1_F536I  | 5'-GATGCTTGTACAAGGAAATTTTAC <u>A</u> TCTTTGTTGCAATACAAGTCTTG-3'       |
| OATP1B1_F537Y  | 5'-GCTTGTACAAGGAAATTTACTTTT <u>A</u> TGTTGCAATACAAGTCTTG-3'           |
| OATP1B1_L543I  | 5'-GTTGCAATACAAGTC <u>A</u> T <u>A</u> AATTTATTTTTCTCTGCACCTGGAGGC-3' |
| OATP1B1_L545S  | 5'-GTTGCAATACAAGTCTTGAATT <u>C</u> TTTTTTCTCTGCACCTGGAGGC-3'          |
| OATP1B1_F546L  | 5'-CAATACAAGTCTTGAATTTATT <u>G</u> TTCTCTGCACCTGGAGGC-3'              |
| OATP1B1_L550T  | 5'-GTCTTGAATTTATTTTTCTCTGCA <u>A</u> CAGGAGGCACCTCACATGTC-3'          |
| OATP1B1_S554T  | 5'-GCACTTGGAGGCAC <u>C</u> ACACATGTCATGCTG-3'                         |
| OATP1B1_H555F  | 5'-GCACTTGGAGGCACCTCA <u>T</u> TTGTCATGCTGATTG-3'                     |
| OATP1B1_V556I  | 5'-CACTTGGAGGCACCTCACAT <u>A</u> TCATGCTGATTG-3'                      |
| OATP1B1_M557L  | 5'-GGCACCTCACATGTC <u>T</u> TGCTGATTGTTAAAATTGTTTC-3'                 |
| OATP1B1_I559T  | 5'-GCACCTCACATGTCATGCTGA <u>C</u> TGTTAAAATTGTTCAACC-3'               |
| OATP1B1_T609A  | 5'-CAACAACGTGGC <u>G</u> CACGTGGGTCATGTAG-3'                          |
| OATP1B1_R610Q  | 5'-CACCAACAACGTGGCACACA <u>A</u> AGGGTCATGTAGG-3'                     |
| OATP1B1_S612A  | 5'-CTGTGGCACACGTGGG <u>G</u> C <u>T</u> TGTAGGACATATAATTCC-3'         |
| OATP1B1_T615I  | 5'-CGTGGGTCATGTAGGAT <u>A</u> TATAATTCCACATCATTTTTCAAGGG-3'           |
| OATP1B1_T619V  | 5'-GTGGGTCATGTAGGACATATAATTCC <u>G</u> TATCATTTTTCAAGGGTC-3'          |
| OATP1B1_S620F  | 5'-GTAGGACATATAATTCCACAT <u>T</u> TTTTTCAAGGGTCTACTTGGGC-3'           |
| OATP1B1_S622G  | 5'-GGACATATAATTCCACATCATTT <u>G</u> GAAAGGTCTACTTGGGCTTG-3'           |
| <b>OATP1B3</b> |                                                                       |
| OATP1B3_G45A   | 5'-GCTAAAGCACTAGGTG <u>C</u> AATCATTATGAAAATTTCCATC-3'                |
| OATP1B3_S545L  | 5'-GCAATTCAAGTCATAAACTTATTGTTCTCTGCAACAGGAGG-3'                       |
| OATP1B3_I615T  | 5'-GCACAAGGAGCTTGTAGGA <u>C</u> ATATAATTCCGTATTTTTTGG-3'              |
