# Supplementary material
Source: PubMed Central journal article supplement (PMC3319192)
Supplement: NIHMS362103-supplement-2_si_002.pdf [file NIHMS362103-supplement-2_si_002.pdf]

# Supporting Figure 1.

A

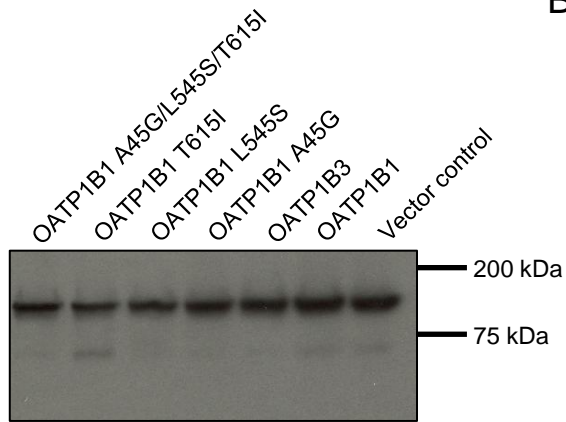

B

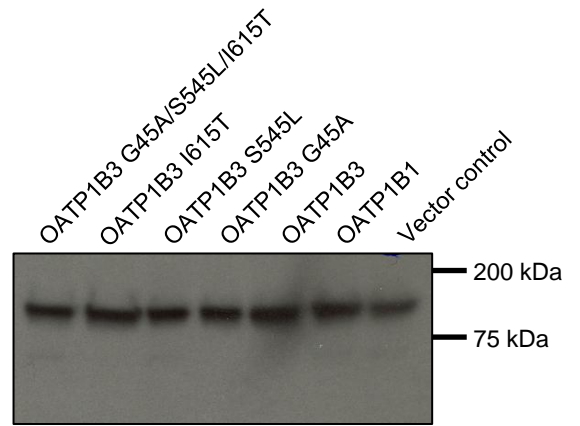

**Supporting Figure 1.** Western blot of calnexin loading control for OATP1B1 and OATP1B3 mutants are shown in (A) and (B), respectively.
